# Supplementary material for: GTDI: a gaming integrated drought index implying hazard causing and bearing impacts changing
Source: Copernicus journal article supplement (doi:10.5194/nhess-2024-45), 2024-03-25
Supplement: Supplementary file [file nhess-2024-45-AC2-supplement.pdf]

**Review: “GTDI: a gaming integrated drought index implying hazard causing and bearing impacts changing” by Zhao et al.**

**RC2: 'Comment on nhes-2024-45', Anonymous Referee #1**

Hao, Z., Hao, F., Singh, V. P., & Zhang, X. (2018). Changes in the severity of compound drought and hot extremes over global land areas. *Environmental Research Letters*, 13(12), 124022. <https://doi.org/10.1088/1748-9326/aaee96>

Hao, Z., Hao, F., Singh, V. P., & Zhang, X. (2019). Statistical prediction of the severity of compound dry-hot events based on El Niño-Southern Oscillation. *Journal of Hydrology*, 572, 243–250. <https://doi.org/10.1016/j.jhydrol.2019.03.001>

Wu, X., Hao, Z., Zhang, X., Li, C., & Hao, F. (2020). Evaluation of severity changes of compound dry and hot events in China based on a multivariate multi-index approach. *Journal of Hydrology*, 583, 124580. <https://doi.org/10.1016/j.jhydrol.2020.124580>

Thank you very much for the suggestion of these references. We have already responded to these references you provided, as can be seen in the the reply (AC1) for major suggestion #2 to your first comment (RC1).

We express our gratitude for your valuable input, and we assure you that all of your comments and concerns will be carefully considered and incorporated into the revised manuscript.
